# Supplementary material for: Prolectin, a Glycan-binding Receptor on Dividing B Cells in Germinal Centers
Source: PubMed Central journal article supplement — J Biol Chem. 2009 May 6;284(27):18537–44. doi: 10.1074/jbc.M109.012807 (PMC2709368; doi:10.1074/jbc.m109.012807), 2009-05-06
Supplement: supp_M109.012807_jbc.M109.012807-1.pdf [file supp_M109.012807_jbc.M109.012807-1.pdf]

**PROLECTIN: A GLYCAN-BINDING RECEPTOR ON DIVIDING B CELLS IN GERMINAL CENTERS**

Sarah A. Graham, Sabine A. F. Jégouzo, Sheng Yan, Alex S. Powlesland, Jacob P. Brady, Maureen E. Taylor, and Kurt Drickamer

**SUPPLEMENTARY TABLE 1**  
**Oligosaccharides on glycan array**

| Glycan number | Glycan Structure                                                                                                                                          |
|---------------|-----------------------------------------------------------------------------------------------------------------------------------------------------------|
| 1             | Neu5Ac $\alpha$ 2-8Neu5Ac $\beta$ -Sp17                                                                                                                   |
| 2             | Neu5Ac $\alpha$ 2-8Neu5Ac $\alpha$ 2-8Neu5Ac $\beta$ -Sp8                                                                                                 |
| 3             | Neu5Gc $\beta$ 2-6G $\alpha$ 1 $\beta$ 1-4GlcNAc-Sp8                                                                                                      |
| 4             | Gal $\beta$ 1-3GlcNAc $\beta$ 1-2Man $\alpha$ 1-3(Gal $\beta$ 1-3GlcNAc $\beta$ 1-2Man $\alpha$ 1-6)Man $\beta$ 1-4GlcNAc $\beta$ 1-4GlcNAc $\beta$ -Sp19 |
| 5             | Gal $\alpha$ -Sp8                                                                                                                                         |
| 6             | Glc $\alpha$ -Sp8                                                                                                                                         |
| 7             | Man $\alpha$ -Sp8                                                                                                                                         |
| 8             | GalNAc $\alpha$ -Sp8                                                                                                                                      |
| 9             | Fuc $\alpha$ -Sp8                                                                                                                                         |
| 10            | Fuc $\alpha$ -Sp9                                                                                                                                         |
| 11            | Rha-Sp8                                                                                                                                                   |
| 12            | Neu5Ac $\alpha$ -Sp8                                                                                                                                      |
| 13            | Neu5Ac $\alpha$ -Sp11                                                                                                                                     |
| 14            | Neu5Ac $\beta$ -Sp8                                                                                                                                       |
| 15            | Gal $\beta$ -Sp8                                                                                                                                          |
| 16            | Glc $\beta$ -Sp8                                                                                                                                          |
| 17            | Man $\beta$ -Sp8                                                                                                                                          |
| 18            | GalNAc $\beta$ -Sp8                                                                                                                                       |
| 19            | GlcNAc $\beta$ -Sp0                                                                                                                                       |
| 20            | GlcNAc $\beta$ -Sp8                                                                                                                                       |
| 21            | GlcN(Gc) $\beta$ -Sp8                                                                                                                                     |
| 22            | Gal $\beta$ 1-4GlcNAc $\beta$ 1-3(Gal $\beta$ 1-4GlcNAc $\beta$ 1-6)GalNAc $\alpha$ -Sp8                                                                  |
| 23            | GlcNAc $\beta$ 1-3(GlcNAc $\beta$ 1-4)(GlcNAc $\beta$ 1-6)GlcNAc-Sp8                                                                                      |
| 24            | [3OSO3][6OSO3]Gal $\beta$ 1-4[6OSO3]GlcNAc $\beta$ -Sp0                                                                                                   |
| 25            | [3OSO3][6OSO3]Gal $\beta$ 1-4GlcNAc $\beta$ -Sp0                                                                                                          |
| 26            | [3OSO3]Gal $\beta$ 1-4Glc $\beta$ -Sp8                                                                                                                    |
| 27            | [3OSO3]Gal $\beta$ 1-4[6OSO3]Glc $\beta$ -Sp0                                                                                                             |
| 28            | [3OSO3]Gal $\beta$ 1-4[6OSO3]Glc $\beta$ -Sp8                                                                                                             |
| 29            | [3OSO3]Gal $\beta$ 1-3(Fuc $\alpha$ 1-4)GlcNAc $\beta$ -Sp8                                                                                               |
| 30            | [3OSO3]Gal $\beta$ 1-3GalNAc $\alpha$ -Sp8                                                                                                                |
| 31            | [3OSO3]Gal $\beta$ 1-3GlcNAc $\beta$ -Sp8                                                                                                                 |
| 32            | [3OSO3]Gal $\beta$ 1-4(Fuc $\alpha$ 1-3)GlcNAc $\beta$ -Sp8                                                                                               |
| 33            | [3OSO3]Gal $\beta$ 1-4[6OSO3]GlcNAc $\beta$ -Sp8                                                                                                          |
| 34            | [3OSO3]Gal $\beta$ 1-4GlcNAc $\beta$ -Sp0                                                                                                                 |
| 35            | [3OSO3]Gal $\beta$ 1-4GlcNAc $\beta$ -Sp8                                                                                                                 |
| 36            | [3OSO3]Gal $\beta$ -Sp8                                                                                                                                   |
| 37            | [4OSO3][6OSO3]Gal $\beta$ 1-4GlcNAc $\beta$ -Sp0                                                                                                          |
| 38            | [4OSO3]Gal $\beta$ 1-4GlcNAc $\beta$ -Sp8                                                                                                                 |
| 39            | 6-H <sub>2</sub> PO <sub>3</sub> Man $\alpha$ -Sp8                                                                                                        |
| 40            | [6OSO3]Gal $\beta$ 1-4Glc $\beta$ -Sp0                                                                                                                    |
| 41            | [6OSO3]Gal $\beta$ 1-4Glc $\beta$ -Sp8                                                                                                                    |
| 42            | [6OSO3]Gal $\beta$ 1-4GlcNAc $\beta$ -Sp8                                                                                                                 |

|    |                                                                                                     |
|----|-----------------------------------------------------------------------------------------------------|
| 43 | [6OSO3]Galβ1-4[6OSO3]Glcβ-Sp8                                                                       |
| 44 | Neu5Acα2-3[6OSO3]Galβ1-4GlcNAcβ-Sp8                                                                 |
| 45 | [6OSO3]GlcNAcβ-Sp8                                                                                  |
| 46 | Neu5Ac(9Ac)α-Sp8                                                                                    |
| 47 | Neu5Ac(9Ac)α2-6Galβ1-4GlcNAcβ-Sp8                                                                   |
| 48 | Manα1-3(Manα1-6)Manβ1-4GlcNAcβ1-4GlcNAcβ-Sp13                                                       |
| 49 | GlcNAcβ1-2Manα1-3(GlcNAcβ1-2Manα1-6)Manβ1-4GlcNAcβ1-4GlcNAcβ-Sp13                                   |
| 50 | Galβ1-4GlcNAcβ1-2Manα1-3(Galβ1-4GlcNAcβ1-2Manα1-6)Manβ1-4GlcNAcβ1-4GlcNAcβ-Sp12                     |
| 51 | Galβ1-4GlcNAcβ1-2Manα1-3(Galβ1-4GlcNAcβ1-2Manα1-6)Manβ1-4GlcNAcβ1-4GlcNAcβ-Sp13                     |
| 52 | Neu5Acα2-6Galβ1-4GlcNAcβ1-2Manα1-3(Neu5Acα2-6Galβ1-4GlcNAcβ1-2Manα1-6)Manβ1-4GlcNAcβ1-4GlcNAcβ-Sp12 |
| 53 | Neu5Acα2-6Galβ1-4GlcNAcβ1-2Manα1-3(Neu5Acα2-6Galβ1-4GlcNAcβ1-2Manα1-6)Manβ1-4GlcNAcβ1-4GlcNAcβ-Sp13 |
| 54 | Neu5Acα2-6Galβ1-4GlcNAcβ1-2Manα1-3(Neu5Acα2-6Galβ1-4GlcNAcβ1-2Manα1-6)Manβ1-4GlcNAcβ1-4GlcNAcβ-Sp8  |
| 55 | Fucα1-2Galβ1-3GalNAcβ1-3Galα-Sp9                                                                    |
| 56 | Fucα1-2Galβ1-3GalNAcβ1-3Galα1-4Galβ1-4Glcβ-Sp9                                                      |
| 57 | Fucα1-2Galβ1-3(Fucα1-4)GlcNAcβ-Sp8                                                                  |
| 58 | Fucα1-2Galβ1-3GalNAcα-Sp8                                                                           |
| 59 | Fucα1-2Galβ1-3GalNAcβ1-4(Neu5Acα2-3)Galβ1-4Glcβ-Sp0                                                 |
| 60 | Fucα1-2Galβ1-3GalNAcβ1-4(Neu5Acα2-3)Galβ1-4Glcβ-Sp9                                                 |
| 61 | Fucα1-2Galβ1-3GlcNAcβ1-3Galβ1-4Glcβ-Sp10                                                            |
| 62 | Fucα1-2Galβ1-3GlcNAcβ1-3Galβ1-4Glcβ-Sp8                                                             |
| 63 | Fucα1-2Galβ1-3GlcNAcβ-Sp0                                                                           |
| 64 | Fucα1-2Galβ1-3GlcNAcβ-Sp8                                                                           |
| 65 | Fucα1-2Galβ1-4(Fucα1-3)GlcNAcβ1-3Galβ1-4(Fucα1-3)GlcNAcβ-Sp0                                        |
| 66 | Fucα1-2Galβ1-4(Fucα1-3)GlcNAcβ1-3Galβ1-4(Fucα1-3)GlcNAcβ1-3Galβ1-4(Fucα1-3)GlcNAcβ-Sp0              |
| 67 | Fucα1-2Galβ1-4(Fucα1-3)GlcNAcβ-Sp0                                                                  |
| 68 | Fucα1-2Galβ1-4(Fucα1-3)GlcNAcβ-Sp8                                                                  |
| 69 | Fucα1-2Galβ1-4GlcNAcβ1-3Galβ1-4GlcNAcβ-Sp0                                                          |
| 70 | Fucα1-2Galβ1-4GlcNAcβ1-3Galβ1-4GlcNAcβ1-3Galβ1-4GlcNAcβ-Sp0                                         |
| 71 | Fucα1-2Galβ1-4GlcNAcβ-Sp0                                                                           |
| 72 | Fucα1-2Galβ1-4GlcNAcβ-Sp8                                                                           |
| 73 | Fucα1-2Galβ1-4Glcβ-Sp0                                                                              |
| 74 | Fucα1-2Galβ-Sp8                                                                                     |
| 75 | Fucα1-3GlcNAcβ-Sp8                                                                                  |
| 76 | Fucα1-4GlcNAcβ-Sp8                                                                                  |
| 77 | Fucβ1-3GlcNAcβ-Sp8                                                                                  |
| 78 | GalNAcα1-3(Fucα1-2)Galβ1-3GlcNAcβ-Sp0                                                               |
| 79 | GalNAcα1-3(Fucα1-2)Galβ1-4(Fucα1-3)GlcNAcβ-Sp0                                                      |
| 80 | GalNAcα1-3(Fucα1-2)Galβ1-4GlcNAcβ-Sp0                                                               |
| 81 | GalNAcα1-3(Fucα1-2)Galβ1-4GlcNAcβ-Sp8                                                               |
| 82 | GalNAcα1-3(Fucα1-2)Galβ1-4Glcβ-Sp0                                                                  |
| 83 | GalNAcα1-3(Fucα1-2)Galβ-Sp8                                                                         |
| 84 | GalNAcα1-3GalNAcβ-Sp8                                                                               |
| 85 | GalNAcα1-3Galβ-Sp8                                                                                  |
| 86 | GalNAcα1-4(Fucα1-2)Galβ1-4GlcNAcβ-Sp8                                                               |
| 87 | GalNAcβ1-3GalNAcα-Sp8                                                                               |
| 88 | GalNAcβ1-3(Fucα1-2)Galβ-Sp8                                                                         |
| 89 | GalNAcβ1-3Galα1-4Galβ1-4GlcNAcβ-Sp0                                                                 |
| 90 | GalNAcβ1-4(Fucα1-3)GlcNAcβ-Sp0                                                                      |
| 91 | GalNAcβ1-4GlcNAcβ-Sp0                                                                               |

|     |                                                                                                                                                                                                 |
|-----|-------------------------------------------------------------------------------------------------------------------------------------------------------------------------------------------------|
| 92  | GalNAc $\beta$ 1-4GlcNAc $\beta$ -Sp8                                                                                                                                                           |
| 93  | Gal $\alpha$ 1-2Gal $\beta$ -Sp8                                                                                                                                                                |
| 94  | Gal $\alpha$ 1-3(Fuc $\alpha$ 1-2)Gal $\beta$ 1-3GlcNAc $\beta$ -Sp0                                                                                                                            |
| 95  | Gal $\alpha$ 1-3(Fuc $\alpha$ 1-2)Gal $\beta$ 1-4(Fuc $\alpha$ 1-3)GlcNAc $\beta$ -Sp0                                                                                                          |
| 96  | Gal $\alpha$ 1-3(Fuc $\alpha$ 1-2)Gal $\beta$ 1-4GlcNAc-Sp0                                                                                                                                     |
| 97  | Gal $\alpha$ 1-3(Fuc $\alpha$ 1-2)Gal $\beta$ 1-4Glc $\beta$ -Sp0                                                                                                                               |
| 98  | Gal $\alpha$ 1-3(Fuc $\alpha$ 1-2)Gal $\beta$ -Sp8                                                                                                                                              |
| 99  | Gal $\alpha$ 1-3(Gal $\alpha$ 1-4)Gal $\beta$ 1-4GlcNAc $\beta$ -Sp8                                                                                                                            |
| 100 | Gal $\alpha$ 1-3GalNAc $\alpha$ -Sp8                                                                                                                                                            |
| 101 | Gal $\alpha$ 1-3GalNAc $\beta$ -Sp8                                                                                                                                                             |
| 102 | 1-3Gal $\beta$ 1-4(Fuc $\alpha$ 1-3)GlcNAc $\beta$ -Sp8                                                                                                                                         |
| 103 | Gal $\alpha$ 1-3Gal $\beta$ 1-3GlcNAc $\beta$ -Sp0                                                                                                                                              |
| 104 | Gal $\alpha$ 1-3Gal $\beta$ 1-4GlcNAc $\beta$ -Sp8                                                                                                                                              |
| 105 | Gal $\alpha$ 1-3Gal $\beta$ 1-4Glc $\beta$ -Sp0                                                                                                                                                 |
| 106 | Gal $\alpha$ 1-3Gal $\beta$ -Sp8                                                                                                                                                                |
| 107 | Gal $\alpha$ 1-4(Fuc $\alpha$ 1-2)Gal $\beta$ 1-4GlcNAc $\beta$ -Sp8                                                                                                                            |
| 108 | Gal $\alpha$ 1-4Gal $\beta$ 1-4GlcNAc $\beta$ -Sp0                                                                                                                                              |
| 109 | Gal $\alpha$ 1-4Gal $\beta$ 1-4GlcNAc $\beta$ -Sp8                                                                                                                                              |
| 110 | Gal $\alpha$ 1-4Gal $\beta$ 1-4Glc $\beta$ -Sp0                                                                                                                                                 |
| 111 | Gal $\alpha$ 1-4GlcNAc $\beta$ -Sp8                                                                                                                                                             |
| 112 | Gal $\alpha$ 1-6Glc $\beta$ -Sp8                                                                                                                                                                |
| 113 | Gal $\beta$ 1-2Gal $\beta$ -Sp8                                                                                                                                                                 |
| 114 | Gal $\beta$ 1-3(Fuc $\alpha$ 1-4)GlcNAc $\beta$ 1-3Gal $\beta$ 1-4(Fuc $\alpha$ 1-3)GlcNAc $\beta$ -Sp0                                                                                         |
| 115 | Gal $\beta$ 1-3(Fuc $\alpha$ 1-4)GlcNAc $\beta$ 1-3Gal $\beta$ 1-4GlcNAc $\beta$ -Sp0                                                                                                           |
| 116 | Gal $\beta$ 1-3(Fuc $\alpha$ 1-4)GlcNAc $\beta$ -Sp0                                                                                                                                            |
| 117 | Gal $\beta$ 1-3(Fuc $\alpha$ 1-4)GlcNAc-Sp8                                                                                                                                                     |
| 118 | Gal $\beta$ 1-3(Fuc $\alpha$ 1-4)GlcNAc $\beta$ -Sp8                                                                                                                                            |
| 119 | Gal $\beta$ 1-3(Gal $\beta$ 1-4GlcNAc $\beta$ 1-6)GalNAc $\alpha$ -Sp8                                                                                                                          |
| 120 | Gal $\beta$ 1-3(GlcNAc $\beta$ 1-6)GalNAc $\alpha$ -Sp8                                                                                                                                         |
| 121 | Gal $\beta$ 1-3(Neu5Ac $\alpha$ 2-6)GalNAc $\alpha$ -Sp8                                                                                                                                        |
| 122 | Gal $\beta$ 1-3(Neu5Ac $\beta$ 2-6)GalNAc $\alpha$ -Sp8                                                                                                                                         |
| 123 | Gal $\beta$ 1-3(Neu5Ac $\alpha$ 2-6)GlcNAc $\beta$ 1-4Gal $\beta$ 1-4Glc $\beta$ -Sp10                                                                                                          |
| 124 | Gal $\beta$ 1-3GalNAc $\alpha$ -Sp8                                                                                                                                                             |
| 125 | Gal $\beta$ 1-3GalNAc $\beta$ -Sp8                                                                                                                                                              |
| 126 | Gal $\beta$ 1-3GalNAc $\beta$ 1-3Gal $\alpha$ 1-4Gal $\beta$ 1-4Glc $\beta$ -Sp0                                                                                                                |
| 127 | Gal $\beta$ 1-3GalNAc $\beta$ 1-4(Neu5Ac $\alpha$ 2-3)Gal $\beta$ 1-4Glc $\beta$ -Sp0                                                                                                           |
| 128 | Gal $\beta$ 1-3GalNAc $\beta$ 1-4Gal $\beta$ 1-4Glc $\beta$ -Sp8                                                                                                                                |
| 129 | Gal $\beta$ 1-3Gal $\beta$ -Sp8                                                                                                                                                                 |
| 130 | Gal $\beta$ 1-3GlcNAc $\beta$ 1-3Gal $\beta$ 1-4GlcNAc $\beta$ -Sp0                                                                                                                             |
| 131 | Gal $\beta$ 1-3GlcNAc $\beta$ 1-3Gal $\beta$ 1-4Glc $\beta$ -Sp10                                                                                                                               |
| 132 | Gal $\beta$ 1-3GlcNAc $\beta$ -Sp0                                                                                                                                                              |
| 133 | Gal $\beta$ 1-3GlcNAc $\beta$ -Sp8                                                                                                                                                              |
| 134 | Gal $\beta$ 1-4(Fuc $\alpha$ 1-3)GlcNAc $\beta$ -Sp0                                                                                                                                            |
| 135 | Gal $\beta$ 1-4(Fuc $\alpha$ 1-3)GlcNAc $\beta$ -Sp8                                                                                                                                            |
| 136 | Gal $\beta$ 1-4(Fuc $\alpha$ 1-3)GlcNAc $\beta$ 1-4Gal $\beta$ 1-4(Fuc $\alpha$ 1-3)GlcNAc $\beta$ -Sp0                                                                                         |
| 137 | Gal $\beta$ 1-4(Fuc $\alpha$ 1-3)GlcNAc $\beta$ 1-4Gal $\beta$ 1-4(Fuc $\alpha$ 1-3)GlcNAc $\beta$ 1-4Gal $\beta$ 1-4(Fuc $\alpha$ 1-3)GlcNAc $\beta$ -Sp0                                      |
| 138 | Gal $\beta$ 1-4[6OSO3]Glc $\beta$ -Sp0                                                                                                                                                          |
| 139 | Gal $\beta$ 1-4[6OSO3]Glc $\beta$ -Sp8                                                                                                                                                          |
| 140 | Gal $\beta$ 1-4GalNAc $\alpha$ 1-3(Fuc $\alpha$ 1-2)Gal $\beta$ 1-4GlcNAc $\beta$ -Sp8                                                                                                          |
| 141 | Gal $\beta$ 1-4GalNAc $\beta$ 1-3(Fuc $\alpha$ 1-2)Gal $\beta$ 1-4GlcNAc $\beta$ -Sp8                                                                                                           |
| 142 | Neu5Ac $\alpha$ 2-3Gal $\beta$ 1-4GlcNAc $\beta$ 1-2Man $\alpha$ 1-3(Neu5Ac $\alpha$ 2-3Gal $\beta$ 1-4GlcNAc $\beta$ 1-2Man $\alpha$ 1-6)Man $\beta$ 1-4GlcNAc $\beta$ 1-4GlcNAc $\beta$ -Sp12 |
| 143 | Gal $\beta$ 1-4GlcNAc $\beta$ 1-3GalNAc $\alpha$ -Sp8                                                                                                                                           |
| 144 | Gal $\beta$ 1-4GlcNAc $\beta$ 1-3Gal $\beta$ 1-4(Fuc $\alpha$ 1-3)GlcNAc $\beta$ 1-3Gal $\beta$ 1-4(Fuc $\alpha$ 1-3)GlcNAc $\beta$ -Sp0                                                        |
| 145 | Gal $\beta$ 1-4GlcNAc $\beta$ 1-3Gal $\beta$ 1-4GlcNAc $\beta$ 1-3Gal $\beta$ 1-4GlcNAc $\beta$ -Sp0                                                                                            |

|     |                                                                                           |
|-----|-------------------------------------------------------------------------------------------|
| 146 | Galβ1-4GlcNAcβ1-3Galβ1-4GlcNAcβ-Sp0                                                       |
| 147 | Galβ1-4GlcNAcβ1-3Galβ1-4Glcβ-Sp0                                                          |
| 148 | Galβ1-4GlcNAcβ1-3Galβ1-4Glcβ-Sp8                                                          |
| 149 | Galβ1-4GlcNAcβ1-6(Galβ1-3)GalNAcα-Sp8                                                     |
| 150 | Galβ1-4GlcNAcβ1-6GalNAcα-Sp8                                                              |
| 151 | Galβ1-4GlcNAcβ-Sp0                                                                        |
| 152 | Galβ1-4GlcNAcβ-Sp8                                                                        |
| 153 | Galβ1-4Glcβ-Sp0                                                                           |
| 154 | Galβ1-4Glcβ-Sp8                                                                           |
| 155 | GlcNAcα1-3Galβ1-4GlcNAcβ-Sp8                                                              |
| 156 | GlcNAcα1-6Galβ1-4GlcNAcβ-Sp8                                                              |
| 157 | GlcNAcβ1-2Galβ1-3GalNAcα-Sp8                                                              |
| 158 | GlcNAcβ1-3(GlcNAcβ1-6)GalNAcα-Sp8                                                         |
| 159 | GlcNAcβ1-3(GlcNAcβ1-6)Galβ1-4GlcNAcβ-Sp8                                                  |
| 160 | GlcNAcβ1-3GalNAcα-Sp8                                                                     |
| 161 | GlcNAcβ1-3Galβ-Sp8                                                                        |
| 162 | GlcNAcβ1-3Galβ1-3GalNAcα-Sp8                                                              |
| 163 | GlcNAcβ1-3Galβ1-4GlcNAcβ-Sp0                                                              |
| 164 | GlcNAcβ1-3Galβ1-4GlcNAcβ-Sp8                                                              |
| 165 | GlcNAcβ1-3Galβ1-4GlcNAcβ1-3Galβ1-4GlcNAcβ-Sp0                                             |
| 166 | GlcNAcβ1-3Galβ1-4Glcβ-Sp0                                                                 |
| 167 | GlcNAcβ1-4-MDPLys                                                                         |
| 168 | GlcNAcβ1-4(GlcNAcβ1-6)GalNAcα-Sp8                                                         |
| 169 | GlcNAcβ1-4Galβ1-4GlcNAcβ-Sp8                                                              |
| 170 | (GlcNAcβ1-4)6β-Sp8                                                                        |
| 171 | (GlcNAcβ1-4)5β-Sp8                                                                        |
| 172 | GlcNAcβ1-4GlcNAcβ1-4GlcNAcβ-Sp8                                                           |
| 173 | GlcNAcβ1-6(Galβ1-3)GalNAcα-Sp8                                                            |
| 174 | GlcNAcβ1-6GalNAcα-Sp8                                                                     |
| 175 | GlcNAcβ1-6Galβ1-4GlcNAcβ-Sp8                                                              |
| 176 | Glcα1-4Glcβ-Sp8                                                                           |
| 177 | Glcα1-4Glcα-Sp8                                                                           |
| 178 | Glcα1-6Glcα1-6Glcβ-Sp8                                                                    |
| 179 | Glcβ1-4Glcβ-Sp8                                                                           |
| 180 | Glcβ1-6Glcβ-Sp8                                                                           |
| 181 | G-ol-Sp8                                                                                  |
| 182 | GlcAa-Sp8                                                                                 |
| 183 | GlcAβ-Sp8                                                                                 |
| 184 | GlcAβ1-3Galβ-Sp8                                                                          |
| 185 | GlcAβ1-6Galβ-Sp8                                                                          |
| 186 | KDNa2-3Galβ1-3GlcNAcβ-Sp0                                                                 |
| 187 | KDNa2-3Galβ1-4GlcNAcβ-Sp0                                                                 |
| 188 | Manα1-2Manα1-2Manα1-3Manα-Sp9                                                             |
| 189 | Manα1-2Manα1-3(Manα1-2Manα1-6)Manα-Sp9                                                    |
| 190 | Manα1-2Manα1-3Manα-Sp9                                                                    |
| 191 | Manα1-6(Manα1-2Manα1-3)Manα1-6(Manα1-2Manα1-3)Manβ1-4GlcNAcβ1-4GlcNAcβ-Sp12               |
| 192 | Manα1-2Manα1-6(Manα1-3)Manα1-6(Manα1-2Manα1-2Manα1-3)Manβ1-4GlcNAcβ1-4GlcNAcβ-Sp12        |
| 193 | Manα1-2Manα1-2Manα1-3(Manα1-2Manα1-3(Manα1-2Manα1-6)Manα1-6)Manβ1-4GlcNAcβ1-4GlcNAcβ-Sp12 |
| 194 | Manα1-3(Manα1-6)Manα-Sp9                                                                  |
| 195 | Manα1-3(Manα1-2Manα1-2Manα1-6)Manα-Sp9                                                    |
| 196 | Manα1-6(Manα1-3)Manα1-6(Manα1-2Manα1-3)Manβ1-4GlcNAcβ1-4GlcNAcβ-Sp12                      |
| 197 | Manα1-6(Manα1-3)Manα1-6(Manα1-3)Manβ1-4GlcNAcβ1-4GlcNAcβ-Sp12                             |

|     |                                                                                                                                                                                                 |
|-----|-------------------------------------------------------------------------------------------------------------------------------------------------------------------------------------------------|
| 198 | Neu5Ac $\alpha$ 2-6Gal $\beta$ 1-4GlcNAc $\beta$ 1-2Man $\alpha$ 1-3(Neu5Ac $\alpha$ 2-3Gal $\beta$ 1-4GlcNAc $\beta$ 1-2Man $\alpha$ 1-6)Man $\beta$ 1-4GlcNAc $\beta$ 1-4GlcNAc $\beta$ -Sp12 |
| 199 | Man $\beta$ 1-4GlcNAc $\beta$ -Sp0                                                                                                                                                              |
| 200 | Fuc $\alpha$ 1-3(Gal $\beta$ 1-4)GlcNAc $\beta$ 1-2Man $\alpha$ 1-3(Fuc $\alpha$ 1-3(Gal $\beta$ 1-4)GlcNAc $\beta$ 1-2Man $\alpha$ 1-6)Man $\beta$ 1-4GlcNAc $\beta$ 1-4GlcNAc $\beta$ -Sp20   |
| 201 | Neu5Ac $\alpha$ 2-3Gal $\beta$ 1-3GalNAc $\alpha$ -Sp8                                                                                                                                          |
| 202 | Neu5Ac $\alpha$ 2-8Neu5Ac $\alpha$ 2-8Neu5Ac $\alpha$ 2-8Neu5Ac $\alpha$ 2-3(GalNAc $\beta$ 1-4)Gal $\beta$ 1-4Glc $\beta$ -Sp0                                                                 |
| 203 | Neu5Ac $\alpha$ 2-8Neu5Ac $\alpha$ 2-8Neu5Ac $\alpha$ 2-3(GalNAc $\beta$ 1-4)Gal $\beta$ 1-4Glc $\beta$ -Sp0                                                                                    |
| 204 | Neu5Ac $\alpha$ 2-8Neu5Ac $\alpha$ 2-8Neu5Ac $\alpha$ 2-3Gal $\beta$ 1-4Glc $\beta$ -Sp0                                                                                                        |
| 205 | Neu5Ac $\alpha$ 2-8Neu5Ac $\alpha$ 2-3(GalNAc $\beta$ 1-4)Gal $\beta$ 1-4Glc $\beta$ -Sp0                                                                                                       |
| 206 | Neu5Ac $\alpha$ 2-8Neu5Ac $\alpha$ 2-8Neu5Aca-Sp8                                                                                                                                               |
| 207 | Neu5Ac $\alpha$ 2-3(6-O-Su)Gal $\beta$ 1-4(Fuc $\alpha$ 1-3)GlcNAc $\beta$ -Sp8                                                                                                                 |
| 208 | Neu5Ac $\alpha$ 2-3(GalNAc $\beta$ 1-4)Gal $\beta$ 1-4GlcNAc $\beta$ -Sp0                                                                                                                       |
| 209 | Neu5Ac $\alpha$ 2-3(GalNAc $\beta$ 1-4)Gal $\beta$ 1-4GlcNAc $\beta$ -Sp8                                                                                                                       |
| 210 | Neu5Ac $\alpha$ 2-3(GalNAc $\beta$ 1-4)Gal $\beta$ 1-4Glc $\beta$ -Sp0                                                                                                                          |
| 211 | Neu5Ac $\alpha$ 2-3(Neu5Ac $\alpha$ 2-3Gal $\beta$ 1-3GalNAc $\beta$ 1-4)Gal $\beta$ 1-4Glc $\beta$ -Sp0                                                                                        |
| 212 | Neu5Ac $\alpha$ 2-3(Neu5Ac $\alpha$ 2-6)GalNAc $\alpha$ -Sp8                                                                                                                                    |
| 213 | Neu5Ac $\alpha$ 2-3GalNAc $\alpha$ -Sp8                                                                                                                                                         |
| 214 | Neu5Ac $\alpha$ 2-3GalNAc $\beta$ 1-4GlcNAc $\beta$ -Sp0                                                                                                                                        |
| 215 | Neu5Ac $\alpha$ 2-3Gal $\beta$ 1-3[6OSO3]GlcNAc-Sp8                                                                                                                                             |
| 216 | Neu5Ac $\alpha$ 2-3Gal $\beta$ 1-3(Fuc $\alpha$ 1-4)GlcNAc $\beta$ -Sp8                                                                                                                         |
| 217 | Neu5Ac $\alpha$ 2-3Gal $\beta$ 1-3(Fuc $\alpha$ 1-4)GlcNAc $\beta$ 1-3Gal $\beta$ 1-4(Fuc $\alpha$ 1-3)GlcNAc $\beta$ -Sp0                                                                      |
| 218 | Neu5Ac $\alpha$ 2-3Gal $\beta$ 1-3(Neu5Ac $\alpha$ 2-3Gal $\beta$ 1-4)GlcNAc $\beta$ -Sp8                                                                                                       |
| 219 | Neu5Ac $\alpha$ 2-3Gal $\beta$ 1-3[6OSO3]GalNAc $\alpha$ -Sp8                                                                                                                                   |
| 220 | Neu5Ac $\alpha$ 2-3Gal $\beta$ 1-3(Neu5Ac $\alpha$ 2-6)GalNAc $\alpha$ -Sp8                                                                                                                     |
| 221 | Neu5Ac $\alpha$ 2-3Gal $\beta$ -Sp8                                                                                                                                                             |
| 222 | Neu5Ac $\alpha$ 2-3Gal $\beta$ 1-3GalNAc $\beta$ 1-3Gal $\alpha$ 1-4Gal $\beta$ 1-4Glc $\beta$ -Sp0                                                                                             |
| 223 | Neu5Ac $\alpha$ 2-3Gal $\beta$ 1-3GlcNAc $\beta$ 1-3Gal $\beta$ 1-4GlcNAc $\beta$ -Sp0                                                                                                          |
| 224 | Neu5Ac $\alpha$ 2-3Gal $\beta$ 1-3GlcNAc $\beta$ -Sp0                                                                                                                                           |
| 225 | Neu5Ac $\alpha$ 2-3Gal $\beta$ 1-3GlcNAc $\beta$ -Sp8                                                                                                                                           |
| 226 | Neu5Ac $\alpha$ 2-3Gal $\beta$ 1-4[6OSO3]GlcNAc $\beta$ -Sp8                                                                                                                                    |
| 227 | Neu5Ac $\alpha$ 2-3Gal $\beta$ 1-4(Fuc $\alpha$ 1-3)[6OSO3]GlcNAc $\beta$ -Sp8                                                                                                                  |
| 228 | Neu5Ac $\alpha$ 2-3Gal $\beta$ 1-4(Fuc $\alpha$ 1-3)GlcNAc $\beta$ 1-3Gal $\beta$ 1-4(Fuc $\alpha$ 1-3)GlcNAc $\beta$ 1-3Gal $\beta$ 1-4(Fuc $\alpha$ 1-3)GlcNAc $\beta$ -Sp0                   |
| 229 | Neu5Ac $\alpha$ 2-3Gal $\beta$ 1-4(Fuc $\alpha$ 1-3)GlcNAc $\beta$ -Sp0                                                                                                                         |
| 230 | Neu5Ac $\alpha$ 2-3Gal $\beta$ 1-4(Fuc $\alpha$ 1-3)GlcNAc $\beta$ -Sp8                                                                                                                         |
| 231 | Neu5Ac $\alpha$ 2-3Gal $\beta$ 1-4(Fuc $\alpha$ 1-3)GlcNAc $\beta$ 1-3Gal $\beta$ -Sp8                                                                                                          |
| 232 | Neu5Ac $\alpha$ 2-3Gal $\beta$ 1-4(Fuc $\alpha$ 1-3)GlcNAc $\beta$ 1-3Gal $\beta$ 1-4GlcNAc $\beta$ -Sp8                                                                                        |
| 233 | Neu5Ac $\alpha$ 2-3Gal $\beta$ 1-4GlcNAc $\beta$ 1-3Gal $\beta$ 1-4(Fuc $\alpha$ 1-3)GlcNAc-Sp0                                                                                                 |
| 234 | Neu5Ac $\alpha$ 2-3Gal $\beta$ 1-4GlcNAc $\beta$ 1-3Gal $\beta$ 1-4GlcNAc $\beta$ 1-3Gal $\beta$ 1-4GlcNAc $\beta$ -Sp0                                                                         |
| 235 | Neu5Ac $\alpha$ 2-3Gal $\beta$ 1-4GlcNAc $\beta$ -Sp0                                                                                                                                           |
| 236 | Neu5Ac $\alpha$ 2-3Gal $\beta$ 1-4GlcNAc $\beta$ -Sp8                                                                                                                                           |
| 237 | Neu5Ac $\alpha$ 2-3Gal $\beta$ 1-4GlcNAc $\beta$ 1-3Gal $\beta$ 1-4GlcNAc $\beta$ -Sp0                                                                                                          |
| 238 | Neu5Ac $\alpha$ 2-3Gal $\beta$ 1-4Glc $\beta$ -Sp0                                                                                                                                              |
| 239 | Neu5Ac $\alpha$ 2-3Gal $\beta$ 1-4Glc $\beta$ -Sp8                                                                                                                                              |
| 240 | Neu5Ac $\alpha$ 2-6GalNAc $\alpha$ -Sp8                                                                                                                                                         |
| 241 | Neu5Ac $\alpha$ 2-6GalNAc $\beta$ 1-4GlcNAc $\beta$ -Sp0                                                                                                                                        |
| 242 | Neu5Ac $\alpha$ 2-6Gal $\beta$ 1-4[6OSO3]GlcNAc $\beta$ -Sp8                                                                                                                                    |
| 243 | Neu5Ac $\alpha$ 2-6Gal $\beta$ 1-4GlcNAc $\beta$ -Sp0                                                                                                                                           |
| 244 | Neu5Ac $\alpha$ 2-6Gal $\beta$ 1-4GlcNAc $\beta$ -Sp8                                                                                                                                           |
| 245 | Neu5Ac $\alpha$ 2-6Gal $\beta$ 1-4GlcNAc $\beta$ 1-3Gal $\beta$ 1-4(Fuc $\alpha$ 1-3)GlcNAc $\beta$ 1-3Gal $\beta$ 1-4(Fuc $\alpha$ 1-3)GlcNAc $\beta$ -Sp0                                     |
| 246 | Neu5Ac $\alpha$ 2-6Gal $\beta$ 1-4GlcNAc $\beta$ 1-3Gal $\beta$ 1-4GlcNAc $\beta$ -Sp0                                                                                                          |
| 247 | Neu5Ac $\alpha$ 2-6Gal $\beta$ 1-4Glc $\beta$ -Sp0                                                                                                                                              |
| 248 | Neu5Ac $\alpha$ 2-6Gal $\beta$ 1-4Glc $\beta$ -Sp8                                                                                                                                              |
| 249 | Neu5Ac $\alpha$ 2-6Gal $\beta$ -Sp8                                                                                                                                                             |

|     |                                                                                                                                                                              |
|-----|------------------------------------------------------------------------------------------------------------------------------------------------------------------------------|
| 250 | Neu5Ac $\alpha$ 2-8Neu5Ac-Sp8                                                                                                                                                |
| 251 | Neu5Ac $\alpha$ 2Ac $\alpha$ 2-8Neu5Ac $\alpha$ 2-3Gal $\beta$ 1-4Glc $\beta$ -Sp0                                                                                           |
| 252 | Neu5Ac $\beta$ 2-6GalNAc $\alpha$ -Sp8                                                                                                                                       |
| 253 | Neu5Ac $\beta$ 2-6Gal $\beta$ 1-4GlcNAc $\beta$ -Sp8                                                                                                                         |
| 254 | Neu5Gca2-3Gal $\beta$ 1-3(Fuc $\alpha$ 1-4)GlcNAc $\beta$ -Sp0                                                                                                               |
| 255 | Neu5Gca2-3Gal $\beta$ 1-3GlcNAc $\beta$ -Sp0                                                                                                                                 |
| 256 | Neu5Gca2-3Gal $\beta$ 1-4(Fuc $\alpha$ 1-3)GlcNAc $\beta$ -Sp0                                                                                                               |
| 257 | Neu5Gca2-3Gal $\beta$ 1-4GlcNAc $\beta$ -Sp0                                                                                                                                 |
| 258 | Neu5Gca2-3Gal $\beta$ 1-4Glc $\beta$ -Sp0                                                                                                                                    |
| 259 | Neu5Gca2-6GalNAc $\alpha$ -Sp0                                                                                                                                               |
| 260 | Neu5Gca2-6Gal $\beta$ 1-4GlcNAc $\beta$ -Sp0                                                                                                                                 |
| 261 | Neu5Gca-Sp8                                                                                                                                                                  |
| 262 | [3OSO3]Gal $\beta$ 1-4(Fuc $\alpha$ 1-3)[6OSO3]Glc-Sp0                                                                                                                       |
| 263 | [3OSO3]Gal $\beta$ 1-4(Fuc $\alpha$ 1-3)Glc-Sp0                                                                                                                              |
| 264 | [3OSO3]Gal $\beta$ 1-4(Fuc $\alpha$ 1-3)[6OSO3]GlcNAc-Sp8                                                                                                                    |
| 265 | [3OSO3]Gal $\beta$ 1-4(Fuc $\alpha$ 1-3)GlcNAc-Sp0                                                                                                                           |
| 266 | Fuc $\alpha$ 1-2[6OSO3]Gal $\beta$ 1-4GlcNAc-Sp0                                                                                                                             |
| 267 | Fuc $\alpha$ 1-2Gal $\beta$ 1-4[6OSO3]GlcNAc-Sp8                                                                                                                             |
| 268 | Fuc $\alpha$ 1-2[6OSO3]Gal $\beta$ 1-4[6OSO3]Glc-Sp0                                                                                                                         |
| 269 | Fuc $\alpha$ 1-2[6OSO3]Gal $\beta$ 1-4Glc-Sp0                                                                                                                                |
| 270 | Fuc $\alpha$ 1-2Gal $\beta$ 1-4[6OSO3]Glc-Sp0                                                                                                                                |
| 271 | Gal $\beta$ 1-3(Fuc $\alpha$ 1-4)GlcNAc $\beta$ 1-3Gal $\beta$ 1-3(Fuc $\alpha$ 1-4)GlcNAc $\beta$ -Sp0                                                                      |
| 272 | Gal $\beta$ 1-3(Gal $\beta$ 1-4GlcNAc $\beta$ 1-6)GalNAc-Sp14                                                                                                                |
| 273 | Gal $\beta$ 1-3(GlcNAc $\beta$ 1-6)GalNAc-Sp14                                                                                                                               |
| 274 | Gal $\beta$ 1-3(Neu5Ac $\alpha$ 2-3Gal $\beta$ 1-4GlcNAc $\beta$ 1-6)GalNAc $\alpha$ -Sp14                                                                                   |
| 275 | Gal $\beta$ 1-3GalNAc $\alpha$ -Sp14                                                                                                                                         |
| 276 | Gal $\beta$ 1-3GlcNAc $\beta$ 1-3Gal $\beta$ 1-3GlcNAc $\beta$ -Sp0                                                                                                          |
| 277 | Gal $\beta$ 1-4(Fuc $\alpha$ 1-3)[6OSO3]GlcNAc-Sp0                                                                                                                           |
| 278 | Gal $\beta$ 1-4(Fuc $\alpha$ 1-3)[6OSO3]Glc-Sp0                                                                                                                              |
| 279 | Gal $\beta$ 1-4(Fuc $\alpha$ 1-3)GlcNAc $\beta$ 1-3Gal $\beta$ 1-3(Fuc $\alpha$ 1-4)GlcNAc $\beta$ -Sp0                                                                      |
| 280 | Gal $\beta$ 1-4GlcNAc $\beta$ 1-3Gal $\beta$ 1-3GlcNAc $\beta$ -Sp0                                                                                                          |
| 281 | Neu5Ac $\alpha$ 2-3Gal $\beta$ 1-3GlcNAc $\beta$ 1-3Gal $\beta$ 1-3GlcNAc $\beta$ -Sp0                                                                                       |
| 282 | Neu5Ac $\alpha$ 2-3Gal $\beta$ 1-4GlcNAc $\beta$ 1-3Gal $\beta$ 1-3GlcNAc $\beta$ -Sp0                                                                                       |
| 283 | [3OSO3]Gal $\beta$ 1-4[6OSO3]GlcNAc $\beta$ -Sp0                                                                                                                             |
| 284 | [3OSO3][4OSO3]Gal $\beta$ 1-4GlcNAc $\beta$ -Sp0                                                                                                                             |
| 285 | [6OSO3]Gal $\beta$ 1-4[6OSO3]GlcNAc $\beta$ -Sp0                                                                                                                             |
| 286 | 6-H <sub>2</sub> PO <sub>3</sub> Glc $\beta$ -Sp10                                                                                                                           |
| 287 | Gal $\alpha$ 1-3(Fuc $\alpha$ 1-2)Gal $\beta$ -Sp18                                                                                                                          |
| 288 | Gal $\alpha$ 1-3GalNAc $\alpha$ -Sp16                                                                                                                                        |
| 289 | Gal $\beta$ 1-3GalNAc $\alpha$ -Sp16                                                                                                                                         |
| 290 | Gal $\beta$ 1-3(Neu5Ac $\alpha$ 2-3Gal $\beta$ 1-4(Fuc $\alpha$ 1-3)GlcNAc $\beta$ 1-6)GalNAc $\alpha$ -Sp14                                                                 |
| 291 | Gal $\beta$ 1-3Gal $\beta$ 1-4GlcNAc $\beta$ -Sp8                                                                                                                            |
| 292 | Gal $\beta$ 1-4GlcNAc $\beta$ 1-2Man $\alpha$ 1-3(Neu5Ac $\alpha$ 2-6Gal $\beta$ 1-4GlcNAc $\beta$ 1-2Man $\alpha$ 1-6)Man $\beta$ 1-4GlcNAc $\beta$ 1-4GlcNAc $\beta$ -Sp12 |
| 293 | Gal $\beta$ 1-4GlcNAc $\beta$ 1-3(Gal $\beta$ 1-4GlcNAc $\beta$ 1-6)Gal $\beta$ 1-4GlcNAc-Sp0                                                                                |
| 294 | Gal $\beta$ 1-4GlcNAc $\beta$ 1-3(GlcNAc $\beta$ 1-6)Gal $\beta$ 1-4GlcNAc-Sp0                                                                                               |
| 295 | Gal $\beta$ 1-4GlcNAc $\alpha$ 1-6Gal $\beta$ 1-4GlcNAc $\beta$ -Sp0                                                                                                         |
| 296 | Gal $\beta$ 1-4GlcNAc $\beta$ 1-6Gal $\beta$ 1-4GlcNAc $\beta$ -Sp0                                                                                                          |
| 297 | GalNAc $\alpha$ 1-3(Fuc $\alpha$ 1-2)Gal $\beta$ -Sp18                                                                                                                       |
| 298 | GalNAc $\alpha$ -Sp15                                                                                                                                                        |
| 299 | GalNAc $\beta$ 1-3Gal $\beta$ -Sp8                                                                                                                                           |
| 300 | GlcA $\beta$ 1-3GlcNAc $\beta$ -Sp8                                                                                                                                          |
| 301 | GlcNAc $\beta$ 1-2Man $\alpha$ 1-3(Neu5Ac $\alpha$ 2-6Gal $\beta$ 1-4GlcNAc $\beta$ 1-2Man $\alpha$ 1-6)Man $\beta$ 1-4GlcNAc $\beta$ 1-4GlcNAc $\beta$ -Sp12                |
| 302 | GlcNAc $\beta$ 1-2Man $\alpha$ 1-3(GlcNAc $\beta$ 1-2Man $\alpha$ 1-6)Man $\beta$ 1-4GlcNAc $\beta$ 1-4GlcNAc $\beta$ -Sp12                                                  |

|     |                                                                                                                                                                                                     |
|-----|-----------------------------------------------------------------------------------------------------------------------------------------------------------------------------------------------------|
| 303 | GlcNAc $\beta$ 1-3Man-Sp10                                                                                                                                                                          |
| 304 | GlcNAc $\beta$ 1-4GlcNAc $\beta$ -Sp10                                                                                                                                                              |
| 305 | GlcNAc $\beta$ 1-4GlcNAc $\beta$ -Sp12                                                                                                                                                              |
| 306 | HOOC(CH <sub>3</sub> )CH-3-O-GlcNAc $\beta$ 1-4GlcNAc $\beta$ -Sp10                                                                                                                                 |
| 307 | Man $\alpha$ 1-3(Man $\alpha$ 1-6)Man $\beta$ 1-4GlcNAc $\beta$ 1-4GlcNAc $\beta$ -Sp12                                                                                                             |
| 308 | Man $\alpha$ 1-6Man $\beta$ -Sp10                                                                                                                                                                   |
| 309 | Man $\alpha$ 1-6(Man $\alpha$ 1-3)Man $\alpha$ 1-6(Man $\alpha$ 1-3)Man $\beta$ -Sp10                                                                                                               |
| 310 | Man $\alpha$ 1-2Man $\alpha$ 1-2Man $\alpha$ 1-3(Man $\alpha$ 1-2Man $\alpha$ 1-6(Man $\alpha$ 1-3)Man $\alpha$ 1-6)Man $\alpha$ -Sp9                                                               |
| 311 | Man $\alpha$ 1-2Man $\alpha$ 1-2Man $\alpha$ 1-3(Man $\alpha$ 1-2Man $\alpha$ 1-6(Man $\alpha$ 1-2Man $\alpha$ 1-3)Man $\alpha$ 1-6)Man $\alpha$ -Sp9                                               |
| 312 | Neu5Ac $\alpha$ 2-3Gal $\beta$ 1-3(Neu5Ac $\alpha$ 2-3Gal $\beta$ 1-4GlcNAc $\beta$ 1-6)GalNAc $\alpha$ -Sp14                                                                                       |
| 313 | Neu5Ac $\alpha$ 2-3Gal $\beta$ 1-3(Neu5Ac $\alpha$ 2-6)GalNAc $\alpha$ -Sp14                                                                                                                        |
| 314 | Neu5Ac $\alpha$ 2-3Gal $\beta$ 1-3GalNAc $\alpha$ -Sp14                                                                                                                                             |
| 315 | Neu5Ac $\alpha$ 2-3Gal $\beta$ 1-4GlcNAc $\beta$ 1-2Man $\alpha$ 1-3(Neu5Ac $\alpha$ 2-6Gal $\beta$ 1-4GlcNAc $\beta$ 1-2Man $\alpha$ 1-6)Man $\beta$ 1-4GlcNAc $\beta$ 1-4GlcNAc $\beta$ -Sp12     |
| 316 | Neu5Ac $\alpha$ 2-6Gal $\beta$ 1-4GlcNAc $\beta$ 1-2Man $\alpha$ 1-3(Gal $\beta$ 1-4GlcNAc $\beta$ 1-2Man $\alpha$ 1-6)Man $\beta$ 1-4GlcNAc $\beta$ 1-4GlcNAc $\beta$ -Sp12                        |
| 317 | Neu5Ac $\alpha$ 2-6Gal $\beta$ 1-4GlcNAc $\beta$ 1-2Man $\alpha$ 1-3(GlcNAc $\beta$ 1-2Man $\alpha$ 1-6)Man $\beta$ 1-4GlcNAc $\beta$ 1-4GlcNAc $\beta$ -Sp12                                       |
| 318 | Neu5Ac $\alpha$ 2-6Gal $\beta$ 1-4GlcNAc $\beta$ 1-2Man $\alpha$ 1-3(Neu5Ac $\alpha$ 2-6Gal $\beta$ 1-4GlcNAc $\beta$ 1-2Man $\alpha$ 1-6)Man $\beta$ 1-4GlcNAc $\beta$ 1-4GlcNAc $\beta$ -N(LT)AVL |
| 319 | Fuc $\alpha$ 1-2Gal $\beta$ 1-3GalNAc $\alpha$ -Sp14                                                                                                                                                |
| 320 | Gal $\beta$ 1-3(Neu5Ac $\alpha$ 2-6)GalNAc $\alpha$ -Sp14                                                                                                                                           |
| 321 | Gal $\beta$ 1-4GlcNAc $\beta$ 1-3GalNAc $\alpha$ -Sp14                                                                                                                                              |
| 322 | Neu5Ac(9Ac)a2-3Gal $\beta$ 1-4GlcNAc $\beta$ -Sp0                                                                                                                                                   |
| 323 | Neu5Ac(9Ac)a2-3Gal $\beta$ 1-3GlcNAc $\beta$ -Sp0                                                                                                                                                   |
| 324 | Neu5Ac $\alpha$ 2-6Gal $\beta$ 1-4GlcNAc $\beta$ 1-3Gal $\beta$ 1-3GlcNAc $\beta$ -Sp0                                                                                                              |
| 325 | Neu5Ac $\alpha$ 2-3Gal $\beta$ 1-3(Fuc $\alpha$ 1-4)GlcNAc $\beta$ 1-3Gal $\beta$ 1-3(Fuc $\alpha$ 1-4)GlcNAc $\beta$ -Sp0                                                                          |
| 326 | Neu5Ac $\alpha$ 2-6Gal $\beta$ 1-4GlcNAc $\beta$ 1-3Gal $\beta$ 1-4GlcNAc $\beta$ 1-3Gal $\beta$ 1-4GlcNAc $\beta$ -Sp0                                                                             |
| 327 | Gal $\alpha$ 1-4Gal $\beta$ 1-4GlcNAc $\beta$ 1-3Gal $\beta$ 1-4Glc $\beta$ -Sp0                                                                                                                    |
| 328 | GalNAc $\beta$ 1-3Gal $\alpha$ 1-4Gal $\beta$ 1-4GlcNAc $\beta$ 1-3Gal $\beta$ 1-4Glc $\beta$ -Sp0                                                                                                  |
| 329 | GalNAc $\alpha$ 1-3(Fuc $\alpha$ 1-2)Gal $\beta$ 1-4GlcNAc $\beta$ 1-3Gal $\beta$ 1-4GlcNAc $\beta$ -Sp0                                                                                            |
| 330 | GalNAc $\alpha$ 1-3(Fuc $\alpha$ 1-2)Gal $\beta$ 1-4GlcNAc $\beta$ 1-3Gal $\beta$ 1-4GlcNAc $\beta$ 1-3Gal $\beta$ 1-4GlcNAc $\beta$ -Sp0                                                           |
| 331 | (Neu5Ac $\alpha$ 2-3-Gal $\beta$ 1-3)(((Neu5Ac $\alpha$ 2-3-Gal $\beta$ 1-4(Fuc $\alpha$ 1-3))GlcNAc $\beta$ 1-6)GalNAc $\alpha$ -Sp14                                                              |
| 332 | GlcNAc $\alpha$ 1-4Gal $\beta$ 1-4GlcNAc $\beta$ 1-3Gal $\beta$ 1-4GlcNAc $\beta$ 1-3Gal $\beta$ 1-4GlcNAc $\beta$ -Sp0                                                                             |
| 333 | GlcNAc $\alpha$ 1-4Gal $\beta$ 1-4GlcNAc $\beta$ -Sp0                                                                                                                                               |
| 334 | GlcNAc $\alpha$ 1-4Gal $\beta$ 1-3GlcNAc $\beta$ -Sp0                                                                                                                                               |
| 335 | GlcNAc $\alpha$ 1-4Gal $\beta$ 1-4GlcNAc $\beta$ 1-3Gal $\beta$ 1-4Glc $\beta$ -Sp0                                                                                                                 |
| 336 | GlcNAc $\alpha$ 1-4Gal $\beta$ 1-4GlcNAc $\beta$ 1-3Gal $\beta$ 1-4(Fuc $\alpha$ 1-3)GlcNAc $\beta$ 1-3Gal $\beta$ 1-4(Fuc $\alpha$ 1-3)GlcNAc $\beta$ -Sp0                                         |
| 337 | GlcNAc $\alpha$ 1-4Gal $\beta$ 1-4GlcNAc $\beta$ 1-3Gal $\beta$ 1-4GlcNAc $\beta$ -Sp0                                                                                                              |
| 338 | GlcNAc $\alpha$ 1-4Gal $\beta$ 1-3GalNAc $\alpha$ -Sp14                                                                                                                                             |
| 339 | Man $\alpha$ 1-3(Neu5Ac $\alpha$ 2-6Gal $\beta$ 1-4GlcNAc $\beta$ 1-2Man $\alpha$ 1-6)Man $\beta$ 1-4GlcNAc $\beta$ 1-4GlcNAc $\beta$ -Sp12                                                         |
| 340 | Neu5Ac $\alpha$ 2-6Gal $\beta$ 1-4GlcNAc $\beta$ 1-2Man $\alpha$ 1-3(Man $\alpha$ 1-6)Man $\beta$ 1-4GlcNAc $\beta$ 1-4GlcNAc $\beta$ -Sp12                                                         |
| 341 | Neu5Ac $\alpha$ 2-6Gal $\beta$ 1-4GlcNAc $\beta$ 1-2Man $\alpha$ 1-6Man $\beta$ 1-4GlcNAc $\beta$ 1-4GlcNAc $\beta$ -Sp12                                                                           |
| 342 | Neu5Ac $\alpha$ 2-6Gal $\beta$ 1-4GlcNAc $\beta$ 1-2Man $\alpha$ 1-3Man $\beta$ 1-4GlcNAc $\beta$ 1-4GlcNAc $\beta$ -Sp12                                                                           |
| 343 | Gal $\beta$ 1-4GlcNAc $\beta$ 1-2Man $\alpha$ 1-3Man $\beta$ 1-4GlcNAc $\beta$ 1-4GlcNAc $\beta$ -Sp12                                                                                              |
| 344 | Gal $\beta$ 1-4GlcNAc $\beta$ 1-2Man $\alpha$ 1-6Man $\beta$ 1-4GlcNAc $\beta$ 1-4GlcNAc $\beta$ -Sp12                                                                                              |
| 345 | Gal $\beta$ 1-4GlcNAc $\beta$ 1-2Man $\alpha$ 1-3(Man $\alpha$ 1-6)Man $\beta$ 1-4GlcNAc $\beta$ 1-4GlcNAc $\beta$ -Sp12                                                                            |
| 346 | GlcNAc $\beta$ 1-2Man $\alpha$ 1-3(GlcNAc $\beta$ 1-2Man $\alpha$ 1-6)Man $\beta$ 1-4GlcNAc $\beta$ 1-4(Fuc $\alpha$ 1-6)GlcNAc $\beta$ -Sp22                                                       |
| 347 | Gal $\beta$ 1-4GlcNAc $\beta$ 1-2Man $\alpha$ 1-3(Gal $\beta$ 1-4GlcNAc $\beta$ 1-2Man $\alpha$ 1-6)Man $\beta$ 1-4GlcNAc $\beta$ 1-4(Fuc $\alpha$ 1-6)GlcNAc $\beta$ -Sp22                         |
| 348 | Gal $\beta$ 1-3GlcNAc $\beta$ 1-2Man $\alpha$ 1-3(Gal $\beta$ 1-3GlcNAc $\beta$ 1-2Man $\alpha$ 1-6)Man $\beta$ 1-4GlcNAc $\beta$ 1-4(Fuc $\alpha$ 1-6)GlcNAc $\beta$ -Sp22                         |
| 349 | Gal $\beta$ 1-3(Fuc $\alpha$ 1-4)GlcNAc $\beta$ 1-2Man $\alpha$ 1-3(Gal $\beta$ 1-3(Fuc $\alpha$ 1-4)GlcNAc $\beta$ 1-2Man $\alpha$ 1-6)Man $\beta$ 1-4GlcNAc $\beta$ 1-4GlcNAc $\beta$ -Sp19       |
| 350 | [6OSO <sub>3</sub> ]GlcNAc $\beta$ 1-3Gal $\beta$ 1-4GlcNAc $\beta$ -Sp0                                                                                                                            |

|     |                                                                                                                       |
|-----|-----------------------------------------------------------------------------------------------------------------------|
| 351 | KDNa2-3Galβ1-4(Fucα1-3)GlcNAc-Sp0                                                                                     |
| 352 | KDNa2-6Galβ1-4GlcNAc-Sp0                                                                                              |
| 353 | KDNa2-3Galβ1-4Glc-Sp0                                                                                                 |
| 354 | KDNa2-3Galβ1-3GalNAcα-Sp14                                                                                            |
| 355 | Fucα1-2Galβ1-3GlcNAcβ1-2Manα1-3(Fucα1-2Galβ1-3GlcNAcβ1-2Manα1-6)Manβ1-4GlcNAcβ1-4GlcNAcβ-Sp20                         |
| 356 | Fucα1-2Galβ1-4GlcNAcβ1-2Manα1-3(Fucα1-2Galβ1-4GlcNAcβ1-2Manα1-6)Manβ1-4GlcNAcβ1-4GlcNAcβ-Sp20                         |
| 357 | Fucα1-2Galβ1-4(Fucα1-3)GlcNAcβ1-2Manα1-3(Fucα1-2Galβ1-4(Fucα1-3)GlcNAcβ1-2Manα1-6)Manβ1-4GlcNAcβ1-4GlcNAcβ-Sp20       |
| 358 | Galα1-3Galβ1-4GlcNAcβ1-2Manα1-3(Galα1-3Galβ1-4GlcNAcβ1-2Manα1-6)Manβ1-4GlcNAcβ1-4GlcNAcβ-Sp20                         |
| 359 | Manα1-3(Galβ1-4GlcNAcβ1-2Manα1-6)Manβ1-4GlcNAcβ1-4GlcNAcβ-Sp12                                                        |
| 360 | Galβ1-3(Fucα1-4)GlcNAcβ1-2Manα1-3(Galβ1-3(Fucα1-4)GlcNAcβ1-2Manα1-6)Manβ1-4GlcNAcβ1-4(Fucα1-6)GlcNAcβ-Sp22            |
| 361 | Neu5Acα2-6GlcNAcβ1-4GlcNAc-Sp21                                                                                       |
| 362 | Neu5Acα2-6GlcNAcβ1-4GlcNAcβ1-4GlcNAc-Sp21                                                                             |
| 363 | Fucα1-2Galβ1-3GlcNAcβ1-3(Galβ1-4(Fucα1-3)GlcNAcβ1-6)Galβ1-4Glc-Sp21                                                   |
| 364 | Galβ1-4GlcNAcβ1-2(Galβ1-4GlcNAcβ1-4)Manα1-3(Galβ1-4GlcNAcβ1-2Manα1-6)Manβ1-4GlcNAcβ1-4GlcNAc-Sp21                     |
| 365 | GalNAcα1-3(Fucα1-2)Galβ1-4GlcNAcβ1-2Manα1-3(GalNAcα1-3(Fucα1-2)Galβ1-4GlcNAcβ1-2Manα1-6)Manβ1-4GlcNAcβ1-4GlcNAcβ-Sp20 |
| 366 | Galα1-3(Fucα1-2)Galβ1-4GlcNAcβ1-2Manα1-3(Galα1-3(Fucα1-2)Galβ1-4GlcNAcβ1-2Manα1-6)Manβ1-4GlcNAcβ1-4GlcNAcβ-Sp20       |
| 367 | Galα1-3Galβ1-4(Fucα1-3)GlcNAcβ1-2Manα1-3(Galα1-3Galβ1-4(Fucα1-3)GlcNAcβ1-2Manα1-6)Manβ1-4GlcNAcβ1-4GlcNAcβ-Sp20       |
| 368 | GalNAcα1-3(Fucα1-2)Galβ1-3GlcNAcβ1-2Manα1-3(GalNAcα1-3(Fucα1-2)Galβ1-3GlcNAcβ1-2Manα1-6)Manβ1-4GlcNAcβ1-4GlcNAcβ-Sp20 |
| 369 | Galα1-3(Fucα1-2)Galβ1-3GlcNAcβ1-2Manα1-3(Galα1-3(Fucα1-2)Galβ1-3GlcNAcβ1-2Manα1-6)Manβ1-4GlcNAcβ1-4GlcNAcβ-Sp20       |
| 370 | Fucα1-2Galβ1-3(Fucα1-4)GlcNAcβ1-2Manα1-3(Fucα1-2Galβ1-3(Fucα1-4)GlcNAcβ1-2Manα1-6)Manβ1-4GlcNAcβ1-4GlcNAcβ-Sp19       |
| 371 | NeuAcα2-3Galβ1-4GlcNAcβ1-3GalNAc-Sp14                                                                                 |
| 372 | NeuAcα2-6Galβ1-4GlcNAcβ1-3GalNAc-Sp14                                                                                 |
| 373 | Neu5Acα2-3Galβ1-4(Fucα1-3)GlcNAcβ1-3GalNAcα-Sp14                                                                      |
| 374 | GalNAcβ1-4GlcNAcβ1-2Manα1-6(GalNAcβ1-4GlcNAcβ1-2Manα1-6)Manβ1-4GlcNAcβ1-4GlcNAc-Sp12                                  |
| 375 | Galβ1-3GalNAcα1-3(Fucα1-2)Galβ1-4Glc-Sp14                                                                             |
| 376 | Galβ1-3GalNAcα1-3(Fucα1-2)Galβ1-4GlcNAc-Sp14                                                                          |
| 377 | GlcNAcβ1-3GalNAcα-Sp14                                                                                                |
| 378 | GlcNAcβ1-6GalNAcα-Sp14                                                                                                |
| 379 | Galβ1-3GlcNAcβ1-3(Galβ1-3GlcNAcβ1-3Galβ1-4GlcNAcβ1-6)Galβ1-4Glcβ-Sp0                                                  |
| 380 | Galβ1-3GlcNAcβ1-3(Galβ1-4(Fucα1-3)GlcNAcβ1-6)Galβ1-4Glc-Sp21                                                          |
| 381 | Fucα1-2Galβ1-3(Fucα1-4)GlcNAcβ1-3(Galβ1-4GlcNAcβ1-6)Galβ1-4Glc-Sp21                                                   |
| 382 | Fucα1-2Galβ1-3(Fucα1-4)GlcNAcβ1-3(Galβ1-4(Fucα1-3)GlcNAcβ1-6)Galβ1-4Glc-Sp21                                          |
| 383 | Galβ1-3GlcNAcβ1-3(Galβ1-3GlcNAcβ1-3Galβ1-4(Fucα1-3)GlcNAcβ1-6)Galβ1-4Glc-Sp21                                         |
| 384 | Galβ1-4GlcNAcβ1-2(Galβ1-4GlcNAcβ1-4)Manα1-3(Galβ1-4GlcNAcβ1-2(Galβ1-4GlcNAcβ1-6)Manα1-6)Manβ1-4GlcNAcβ1-4GlcNAcβ-Sp21 |
| 385 | GlcNAcβ1-2(GlcNAcβ1-4)Manα1-3(GlcNAcβ1-2Manα1-6)Manβ1-4GlcNAcβ1-4GlcNAc-Sp21                                          |
| 386 | Fucα1-2Galβ1-3GalNAcα1-3(Fucα1-2)Galβ1-4Glcβ-Sp0                                                                      |
| 387 | Fucα1-2Galβ1-3GalNAcα1-3(Fucα1-2)Galβ1-4GlcNAcβ-Sp0                                                                   |
| 388 | Galβ1-3GlcNAcβ1-3GalNAcα-Sp14                                                                                         |
| 389 | Neu5Acα2-3(GalNAcβ1-4)Galβ1-4GlcNAcβ1-3GalNAcα-Sp14                                                                   |
| 390 | GalNAcα1-3(Fucα1-2)Galβ1-3GalNAcα1-3(Fucα1-2)Galβ1-4GlcNAcβ-Sp0                                                       |
| 391 | Galα1-3Galβ1-3GlcNAcβ1-2Manα1-3(Galα1-3Galβ1-3GlcNAcβ1-2Manα1-6)Manβ1-4GlcNAcβ1-4GlcNAc-Sp19                          |



|     |                                                                                                                                                                                                                      |
|-----|----------------------------------------------------------------------------------------------------------------------------------------------------------------------------------------------------------------------|
| 392 | Gal $\alpha$ 1-3Gal $\beta$ 1-3(Fuc $\alpha$ 1-4)GlcNAc $\beta$ 1-2Man $\alpha$ 1-3(Gal $\alpha$ 1-3Gal $\beta$ 1-3(Fuc $\alpha$ 1-4)GlcNAc $\beta$ 1-2Man $\alpha$ 1-6)Man $\beta$ 1-4GlcNAc $\beta$ 1-4GlcNAc-Sp19 |
| 393 | Neu5Ac $\alpha$ 2-3Gal $\beta$ 1-3GlcNAc $\beta$ 1-2Man $\alpha$ 1-3(Neu5Ac $\alpha$ 2-3Gal $\beta$ 1-3GlcNAc $\beta$ 1-2Man $\alpha$ 1-6)Man $\beta$ 1-4GlcNAc $\beta$ 1-4GlcNAc-Sp19                               |
| 394 | Gal $\beta$ 1-4GlcNAc $\beta$ 1-2Man $\alpha$ 1-3(GlcNAc $\beta$ 1-2Man $\alpha$ 1-6)Man $\beta$ 1-4GlcNAc $\beta$ 1-4GlcNAc-Sp12                                                                                    |
| 395 | GlcNAc $\beta$ 1-2Man $\alpha$ 1-3(Gal $\beta$ 1-4GlcNAc $\beta$ 1-2Man $\alpha$ 1-6)Man $\beta$ 1-4GlcNAc $\beta$ 1-4GlcNAc-Sp12                                                                                    |
| 396 | Neu5Ac $\alpha$ 2-3Gal $\beta$ 1-3GlcNAc $\beta$ 1-3GalNaca-Sp14                                                                                                                                                     |
| 397 | Fuc $\alpha$ 1-2Gal $\beta$ 1-4GlcNAc $\beta$ 1-3GalNaca-Sp14                                                                                                                                                        |
| 398 | Gal $\beta$ 1-4(Fuc $\alpha$ 1-3)GlcNAc $\beta$ 1-3GalNaca-Sp14                                                                                                                                                      |
| 399 | GalNaca1-3GalNac $\beta$ 1-3Gal $\alpha$ 1-4Gal $\beta$ 1-4GlcNAc $\beta$ -Sp0                                                                                                                                       |
| 400 | Gal $\alpha$ 1-4Gal $\beta$ 1-3GlcNAc $\beta$ 1-2Man $\alpha$ 1-3(Gal $\alpha$ 1-4Gal $\beta$ 1-3GlcNAc $\beta$ 1-2Man $\alpha$ 1-6)Man $\beta$ 1-4GlcNAc $\beta$ 1-4GlcNAc $\beta$ -Sp19                            |
| 401 | Gal $\alpha$ 1-4Gal $\beta$ 1-4GlcNAc $\beta$ 1-2Man $\alpha$ 1-3(Gal $\alpha$ 1-4Gal $\beta$ 1-4GlcNAc $\beta$ 1-2Man $\alpha$ 1-6)Man $\beta$ 1-4GlcNAc $\beta$ 1-4GlcNAc $\beta$ -LVaNKT                          |
| 402 | Gal $\alpha$ 1-3Gal $\beta$ 1-4GlcNAc $\beta$ 1-3GalNaca-Sp14                                                                                                                                                        |
| 403 | Gal $\beta$ 1-3GlcNAc $\beta$ 1-6Gal $\beta$ 1-4GlcNAc $\beta$ -Sp0                                                                                                                                                  |
| 404 | Gal $\beta$ 1-3GlcNAc $\alpha$ 1-6Gal $\beta$ 1-4GlcNAc $\beta$ -Sp0                                                                                                                                                 |
| 405 | GalNac $\beta$ 1-3Gal $\alpha$ 1-6Gal $\beta$ 1-4Glc $\beta$ -Sp8                                                                                                                                                    |
| 406 | GlcNAc $\beta$ 1-6(GlcNAc $\beta$ 1-3)GalNac $\alpha$ -Sp14                                                                                                                                                          |
